# Supplementary material for: Hierarchical hollow microspheres Na3V2(PO4)2F3C@rGO as high-performance cathode materials for sodium ion batteries
Source: Royal Society of Chemistry journal article supplement (doi:10.1039/d0nj02210a), 2020-01-01
Supplement: d0nj02210a1.pdf [file d0nj02210a1.pdf]

New Journal of Chemistry

*Electronic Supplementary Information (ESI) for*

**Hierarchical hollow microspheres  $\text{Na}_3\text{V}_2(\text{PO}_4)_2\text{F}_3@C@rGO$   
as high-performance cathode materials for sodium ion  
batteries**

*Peng Du,<sup>b,c</sup> Kan Mi,<sup>a,b</sup> Fangdong Hu,<sup>a</sup> Xiaolei Jiang,<sup>\*a,b</sup> Debao Wang<sup>\*c</sup> and Xiuwen Zheng<sup>\*a,b</sup>*

*<sup>a</sup> School of Chemistry and Chemical Engineering, Linyi University, Linyi, 276000, PR China.*

*<sup>b</sup> Key Laboratory of Functional Nanomaterials and Technology in Universities of Shandong, Linyi University, Linyi, 276000, PR China.*

*<sup>c</sup> Key Laboratory of Optic-electric Sensing and Analytical Chemistry for Life Science (MOE), and College of Chemistry and Molecular Engineering, Qingdao University of Science and Technology, Qingdao 266042, PR China.*

*\*Corresponding Author*

*E-mail address: jiangxiaolei@lyu.edu.cn,*

*dbwang@qust.edu.cn,*

*zhengxiuwen@lyu.edu.cn*

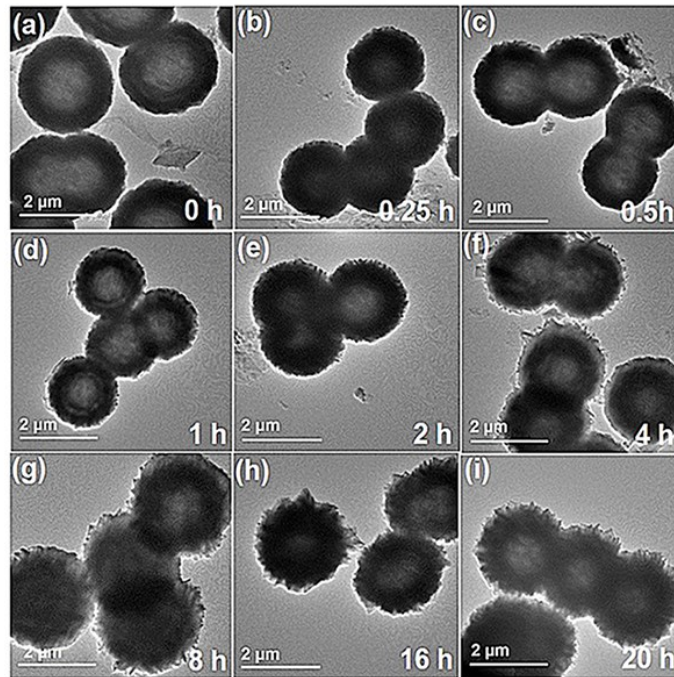

Fig. S1 TEM images of samples with different hydrothermal reaction times.

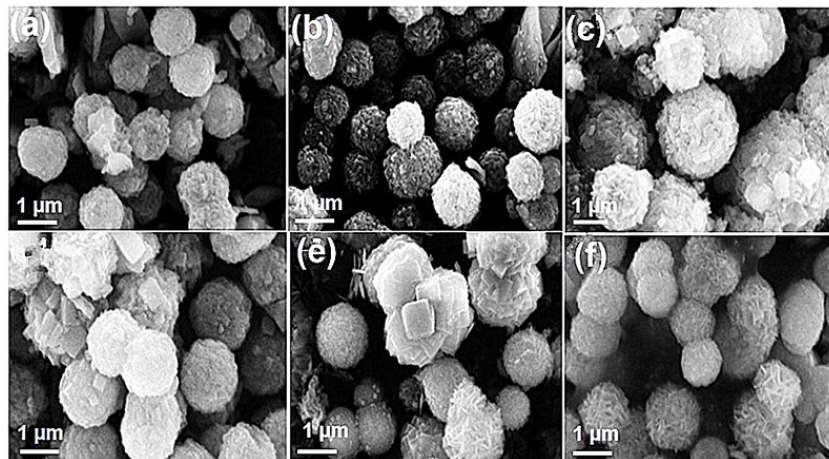

Fig. S2. (a-c) SEM images of samples at different times without glucose (2h, 8h and 20h); (d-f) SEM images of NVPF@C with different amounts of glucose (0g, 0.1g and 0.2g).

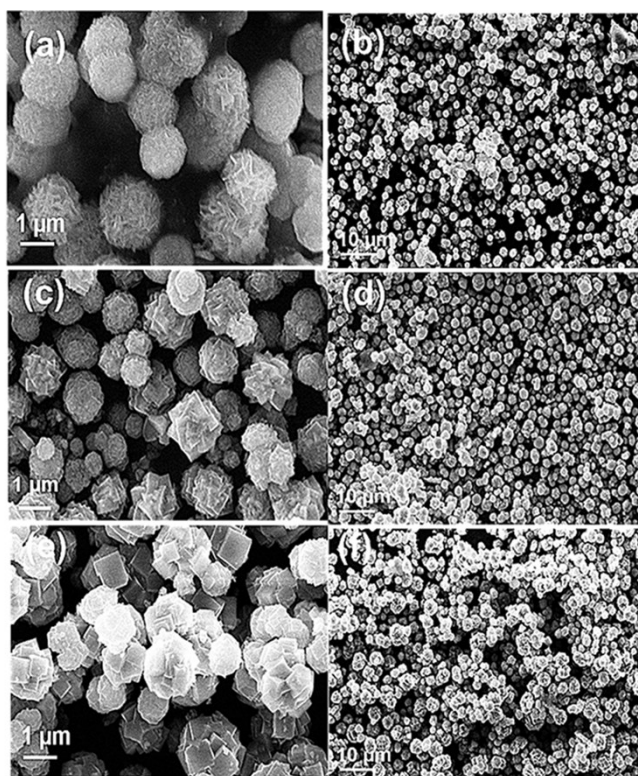

Fig. S3 (a-f) SEM images of the NVPF@C at different solvent ratios. (a, b) 1:7, (c, d) 1:3, (e, f) 3:5.

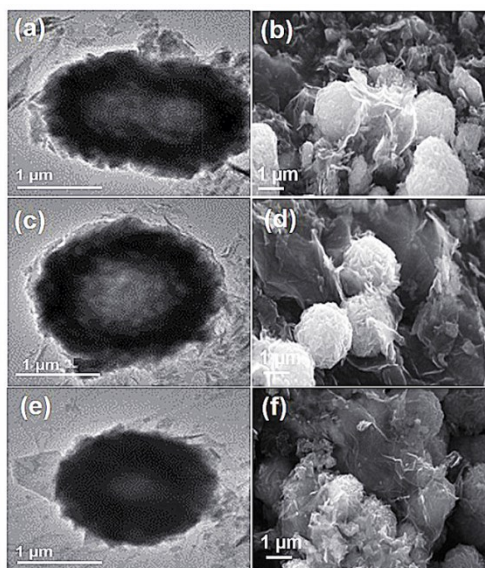

Fig. S4 TEM and SEM images of (a, b) NVPF@C@5% rGO; (c, d) NVPF@C@10% rGO and (e, f) NVPF@C@15% rGO.

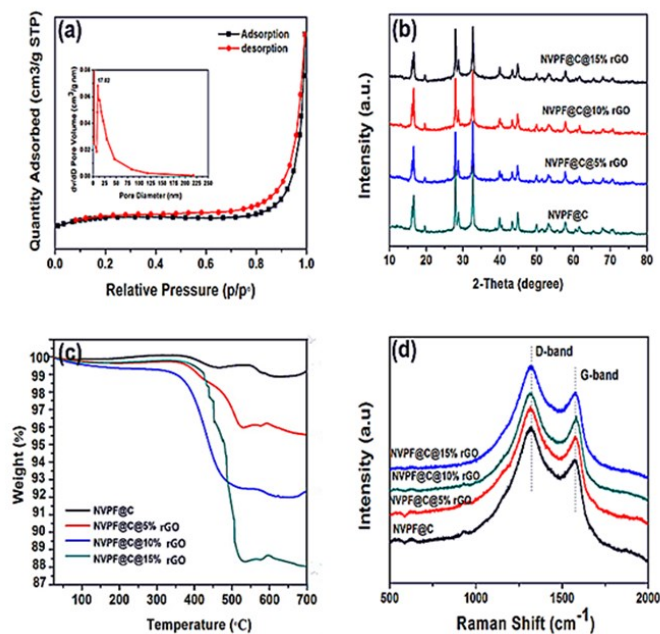

Fig. S5 (a) Nitrogen adsorption and desorption isotherm of NVPF@C(inset: pore-size distribution curves). (b) XRD patterns, (c) TGA and (d) Raman scattering spectrums of the NVPF@C, NVPF@C@5% rGO, NVPF@C@10% rGO and NVPF@C@15% rGO.

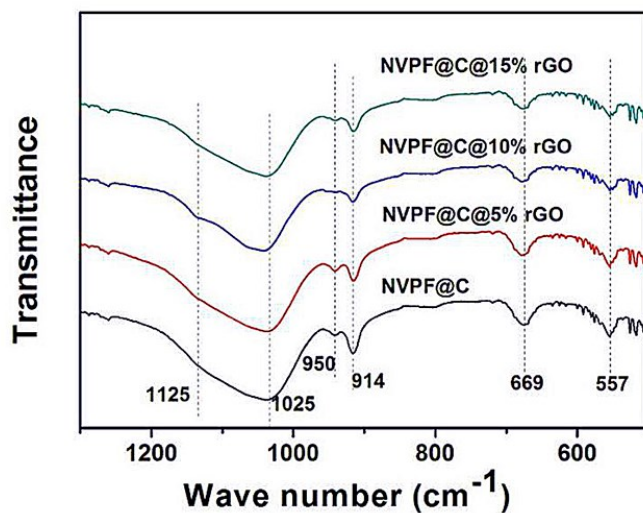

Fig. S6 FTIR spectras of the NVPF@C, NVPF@C@5% rGO, NVPF@C@10% rGO and NVPF@C@15% rGO.



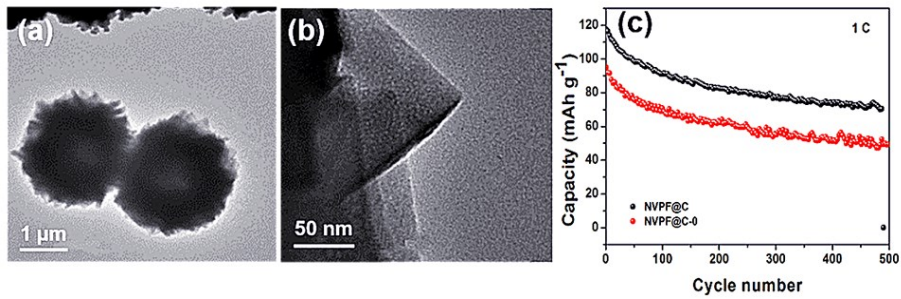

Fig. S7 (a, b) TEM images of the NVPF@C-0; (c) Cycling performances of NVPF@C and NVPF@C-0.

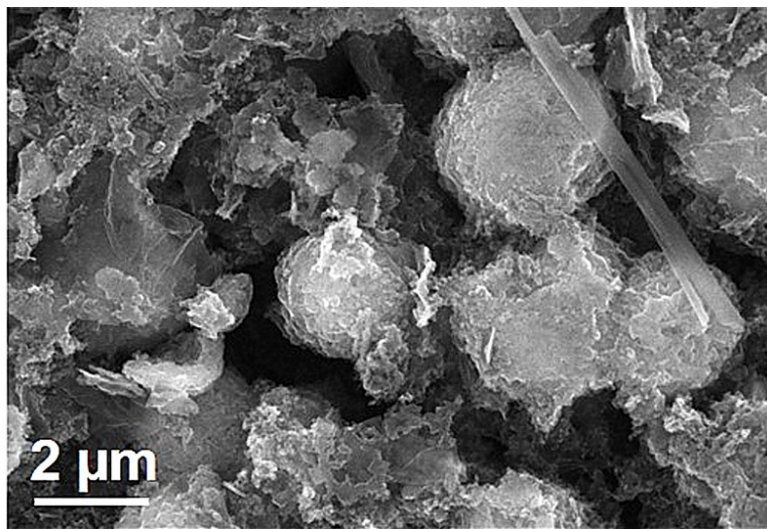

Fig. S8 The SEM image of NVPF@C@10% rGO after 1500 cycles at 5 C.
